# Supplementary material
Source: PubMed Central journal article supplement (PMC2659470)

Figure S1

A

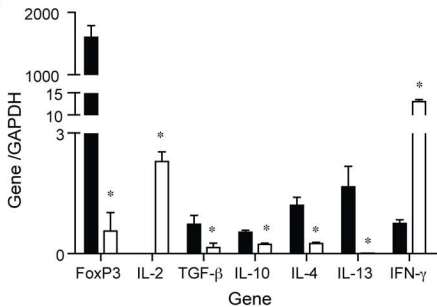

B

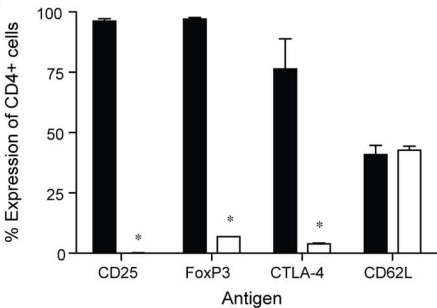

C

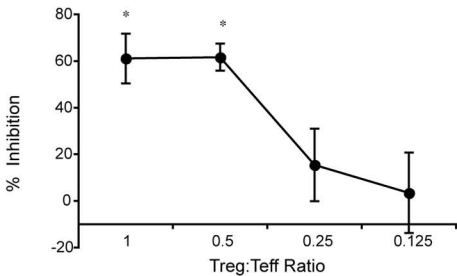

Figure S2

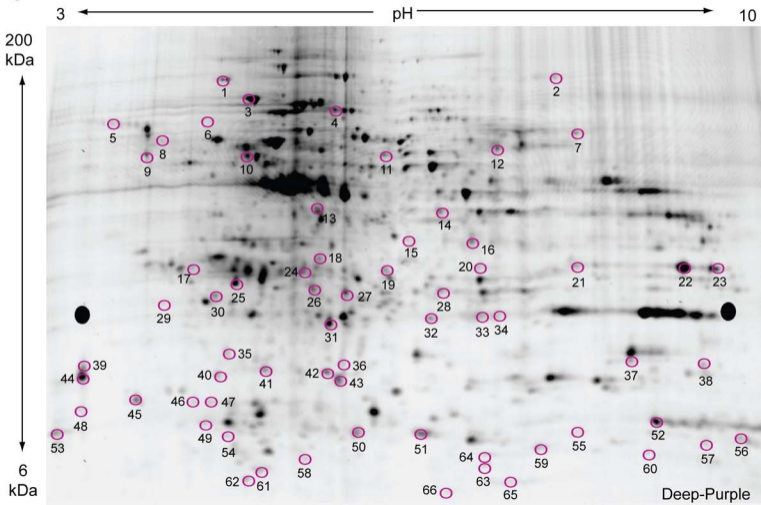

Supplement: NIHMS92089-supplement-1.pdf [file NIHMS92089-supplement-1.pdf]
